## CORRESPONDENCE

Anesthesiology  
80:961, 1994  
© 1994 American Society of Anesthesiologists, Inc.  
J. B. Lippincott Company, Philadelphia

## Cause of Hypotension after Isolated Limb Perfusion with Tumor Necrosis Factor

*To the Editor:*—Sigurdsson *et al.*<sup>1</sup> report an episode of hypotension, oxygen desaturation, and increasing pulmonary artery pressures requiring aggressive resuscitation. They attribute this episode to the effects of tumor necrosis factor (TNF) liberated after release of the tourniquet at the conclusion of the isolated limb perfusion. We believe that these symptoms may have been attributable to the dextran flush rather than toxic effects of TNF.

We have performed 40 hyperthermic isolated limb perfusions at the National Institutes of Health using TNF, melphalan, and interferon protocol with patients with sarcoma or melanoma. For only one of the early perfusions did we have a situation as described above, with rapid decompensation occurring with tourniquet release. We attributed it to the dextran flush because of the rapidity at which it occurred.

The toxic effects of systemic TNF and dextran anaphylaxis<sup>2,3</sup> may appear similar. However, the effects of systemic TNF consistently manifest 3–4 h after tourniquet release, even in patients who have had up to an 8% recorded leak, assuming complete flush. The symptoms are treated with fluids and vasopressors until resolution and have never required ventilatory support. Furthermore, almost all patients have increased temperatures at the conclusion, which we attribute to preoperative interferon, external warming blankets for hyperthermia, and the perfusate drug.

We recommend that the authors reperfuse the isolated limb with

hetastarch or albumin rather than dextran to avoid this problem in the future.

**Barry M. Wertheimer, M.D.**  
Georgetown University Medical Center  
Anesthesia Section, Clinical Center

**Douglas L. Fraker, M.D.**  
Senior Investigator  
National Cancer Institute, Surgery Branch  
Building 10, Room 2C624

National Institutes of Health  
Bethesda, Maryland 20892

### References

1. Sigurdsson GH, Nachbur B, Lejeune FJ: Anesthesiologists' management of isolated limb perfusion with "high-dose" tumor necrosis factor  $\alpha$ . *ANESTHESIOLOGY* 79:1433–1437, 1993
2. Dutcher JP: *Modern Transfusion Therapy*. Boca Raton, CRC, 1990, pp 140–141
3. deWeck AL, Bundgaard H: *Allergic Reactions to Drugs*. Berlin, Springer, 1983, pp 601–602

(Accepted for publication January 24, 1994.)

Anesthesiology  
80:961–962, 1994  
© 1994 American Society of Anesthesiologists, Inc.  
J. B. Lippincott Company, Philadelphia

*In Reply:*—It is well known that dextran can cause allergic reactions in patients.<sup>1–3</sup> However, severe anaphylactic reactions have become rare since hapten inhibition of dextran-reactive antibodies with dextran one (MW 1000 Dalton, Promiten) became a routine pretreatment in clinical practice.<sup>3</sup> According to routine at our institution, the patient we described received hapten before administration of dextran.<sup>4</sup> In addition, the patient received dextran on the 2nd and 3rd postoperative days with no reaction, which precludes dextran as a cause of the episode described. Thus, we still assume that the reaction in our patient was due to tumor necrosis factor (TNF) liberated after release of the tourniquet.<sup>4</sup> Perhaps the reaction Wert-

heimer and Fraker mention and attribute to the use of dextran was caused by TNF as well. In fact, severe circulatory and respiratory reactions often have been described after TNF administration, in both humans and animals.<sup>4–8</sup>

**Gisli H. Sigurdsson, M.D., Ph.D.**  
Associate Professor  
Department of Anesthesia and Intensive Care  
University of Berne, Inselspital  
CH-3010 Berne  
Switzerland

## References

1. Schöning B, Koch H: Patherglequote verschiedener Plasmasubstitute an Haut und Respirationstrakt orthopädischer Patienten: Anaesthesist 24:507–511, 1975
2. Bomball-Girard D, Boulechfar H, Tangre M, Landillon N, Bussel A: Comparative study of the efficacy and tolerability of 2 plasma substitutes used as vascular loading solutions during plasma exchange. Ann Med Intern 141:611–614, 1990
3. Messmer KFW: The use of plasma substitutes with special attention to their side effects. World J Surg 11:69–74, 1987
4. Sigurdsson GH, Nachbur B, Lejeune FJ: Anesthesiologists' management of isolated limb perfusion with "high dose" tumor necrosis factor  $\alpha$ . Anesthesiology 79:1433–1437, 1993
5. Lejeune FJ, Lienard D, Leyvraz S, Mirimanoff RO: Regional therapy of melanoma. Eur J Cancer 29A:606–612, 1993
6. Tracey KJ, Beutler B, Lowry SF: Shock and tissue injury induced by recombinant human cachectin. Science 234:470–474, 1986
7. Tracey KJ, Lowry SF, Fahey TJ: Cachectin/tumor necrosis factor lethal shock and stress hormone responses in the dog. Surg Gynecol Obstet 164:425–422, 1987
8. Ferrari-Baliviera E, Mealy K, Smith RJ, Wilmore JW: Tumor necrosis factor induces adult respiratory distress syndrome in rats. Arch Surg 124:1400–1405, 1989

*(Accepted for publication January 24, 1994.)*
